# Supplementary material for: Epidemiologic Evidence for Airborne Transmission of SARS-CoV-2 during Church Singing, Australia, 2020
Source: Emerg Infect Dis. 2021 Jun;27(6):1677–80. doi: 10.3201/eid2706.210465 (PMC8153858; doi:10.3201/eid2706.210465)
Supplement: Appendix — Additional information on airborne transmission of severe acute respiratory syndrome coronavirus 2 during church singing, Australia, 2020. [file 21-0465-Techapp-s1.pdf]

# Epidemiologic Evidence for Airborne Transmission of SARS-CoV-2 during Church Singing, Australia, 2020

## Appendix

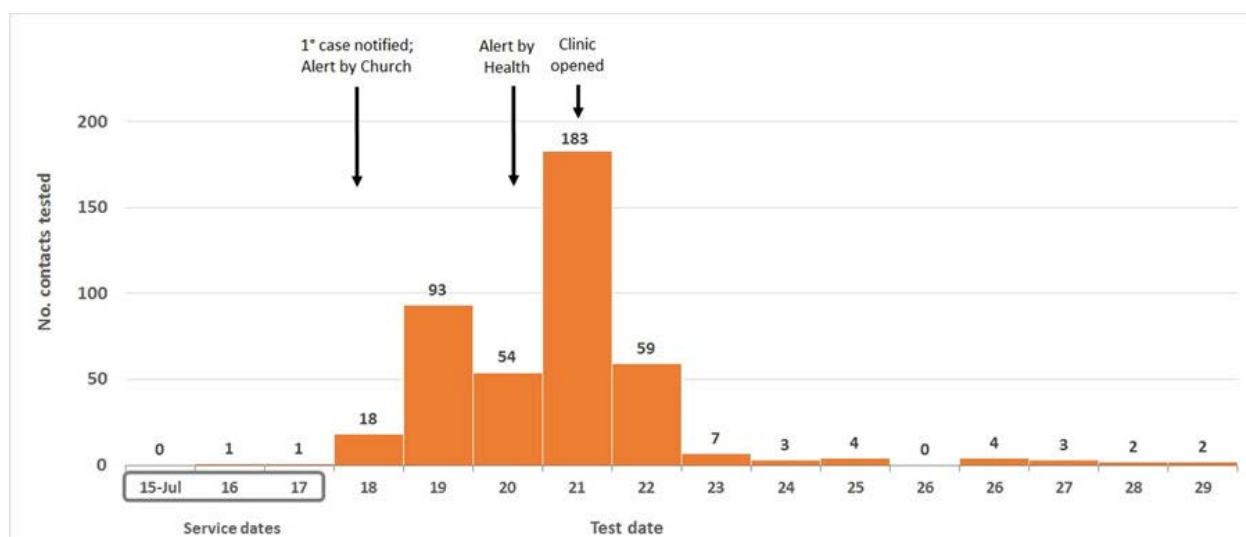

**Appendix Figure 1.** Number of close contacts tested for severe acute respiratory syndrome coronavirus 2, by date of test, in relation to key events during outbreak in the church, Australia, 2020.

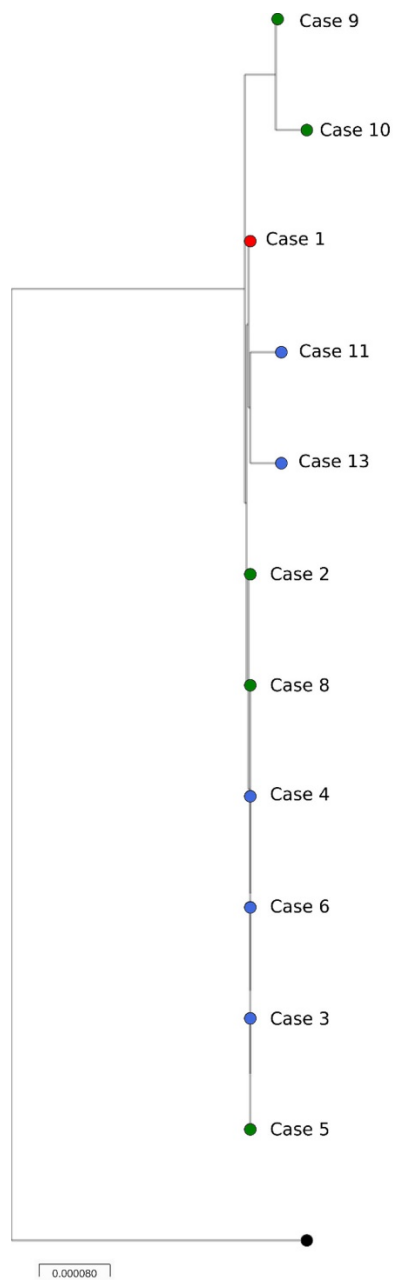

**Appendix Figure 2.** Phylogenetic analysis of severe acute respiratory syndrome coronavirus 2 (SARS-CoV-2) genomes sequenced from case-patients during outbreak in the church, Australia, 2020. Black node indicates the tree root (GISAID accession no. EPI-ISL-413856); red node indicates primary case-patient; blue node indicates secondary case-patient from July 15 service; and green node indicates secondary case-patient from July 16 service. Scale bar indicates nucleotide substitutions per site. GISAID virus names of SARS-CoV-2 genomes hCoV-19/Australia/NSW657/2020, hCoV-19/Australia/NSW682/2020, hCoV-19/Australia/NSW698/2020, hCoV-19/Australia/NSW699/2020, hCoV-19/Australia/NSW707/2020, hCoV-19/Australia/NSW708/2020, hCoV-19/Australia/NSW715/2020, hCoV-19/Australia/NSW727/2020, hCoV-19/Australia/NSW747/2020, hCoV-19/Australia/NSW755/2020.
